# Supplementary material
Source: PubMed Central journal article supplement (PMC8375571)
Supplement: NIHMS1720645-supplement-Supple_fig_1.pdf [file NIHMS1720645-supplement-Supple_fig_1.pdf]

**A**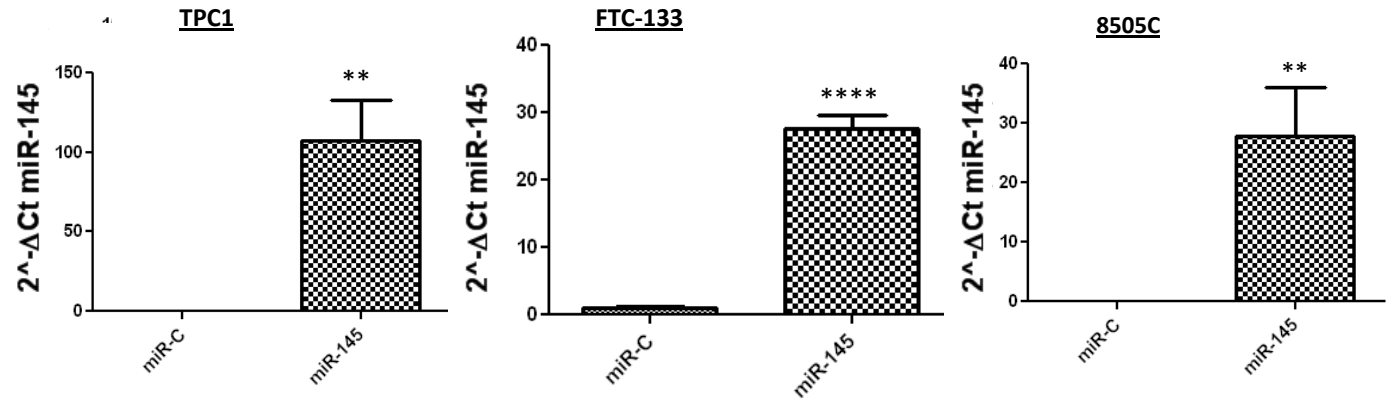**B**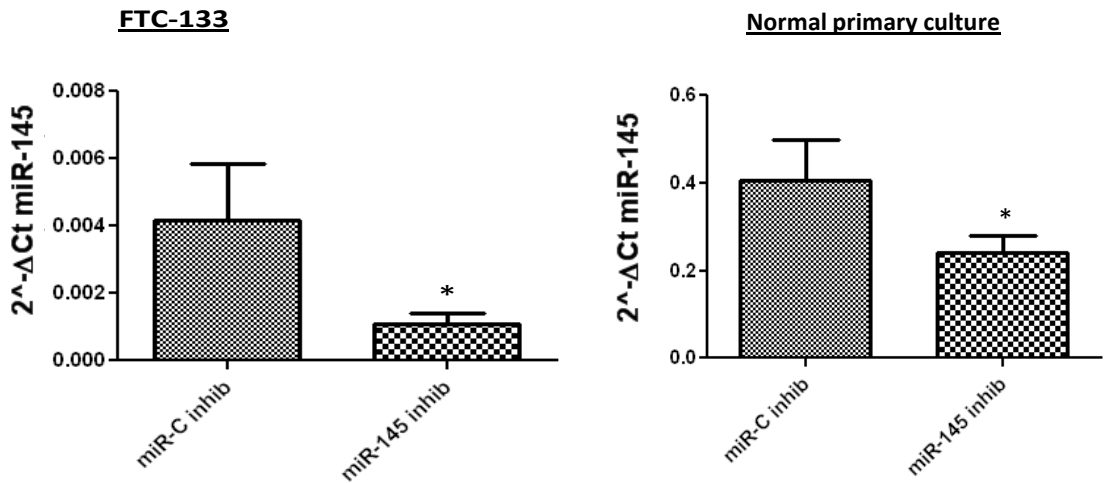

**Supplemental figure 1:** Measurement of miR-145 after transfection with miR-145 mimic or inhibitor. **(A)** miR-145 level detected by RT-PCR 72 hours after transfection by either miR-145 or miR-C. **(B)** miR-145 expression in FTC-133 and normal primary culture, 3 days and 6 days after transfection by either miR-145 inhibitor or miR-C inhibitor. Experiments were performed as biological triplicate, errors bars represent SEM. \*\*\*\*P<0.001; \*P<0.05.
