# Supplementary material
Source: PubMed Central journal article supplement (PMC8375571)
Supplement: NIHMS1720645-supplement-Supple_fig_2.pdf [file NIHMS1720645-supplement-Supple_fig_2.pdf]

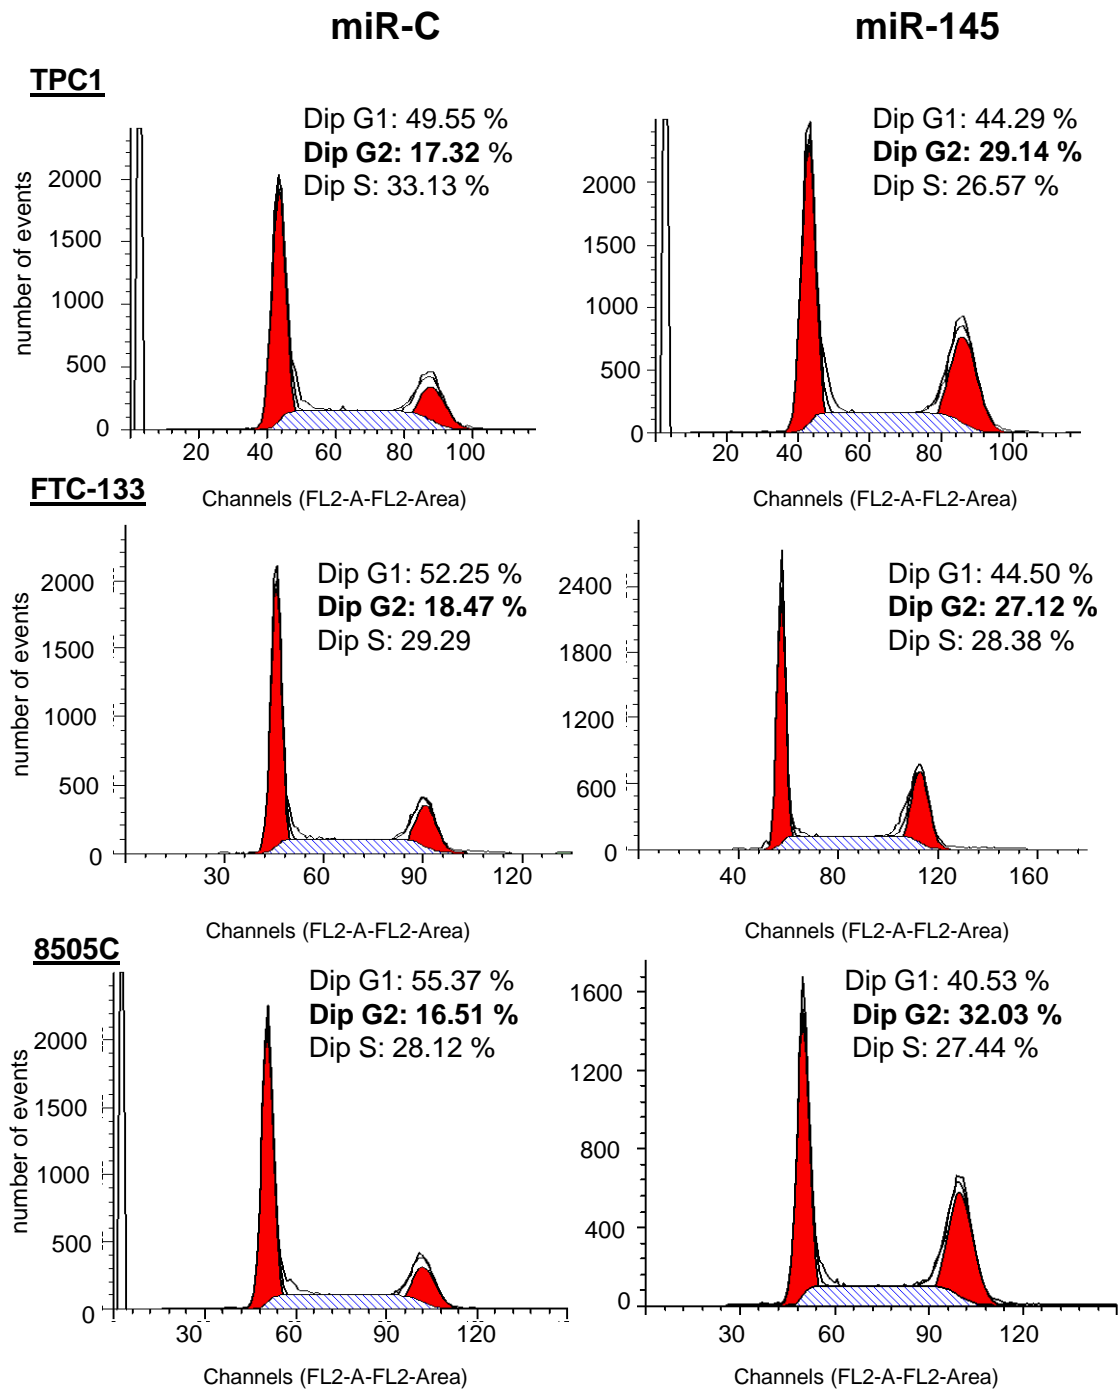

**Supplemental figure 2:** Cell cycle analysis with miR-145 and miR-control transfection . G2/M arrest was increased by miR-145 overexpression.
