# Supplementary material
Source: PubMed Central journal article supplement (PMC8375571)
Supplement: NIHMS1720645-supplement-Supple_fig_3.pdf [file NIHMS1720645-supplement-Supple_fig_3.pdf]

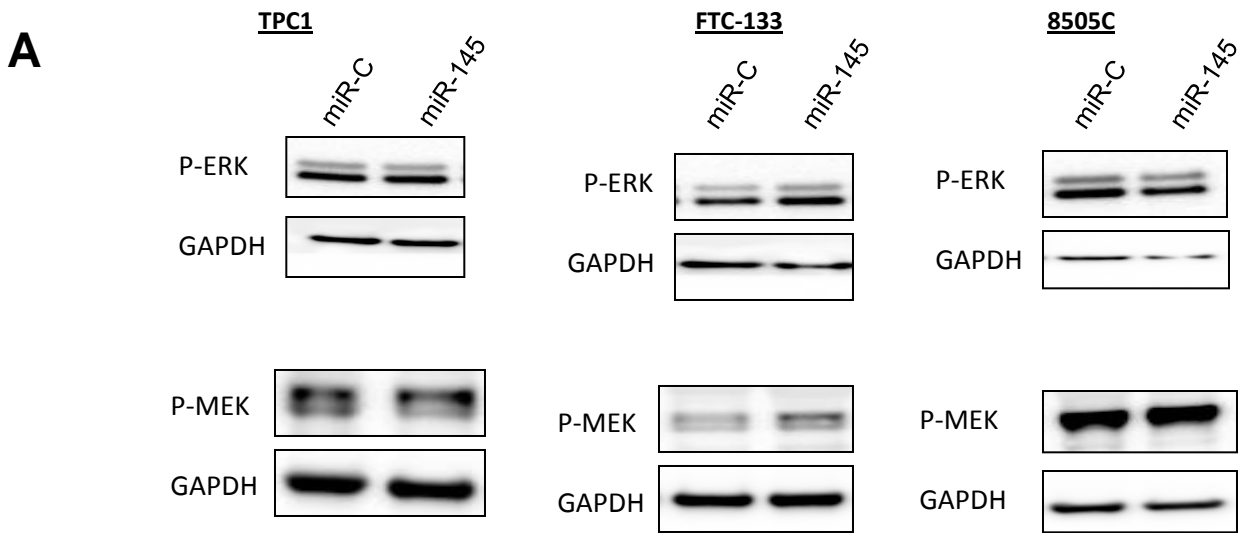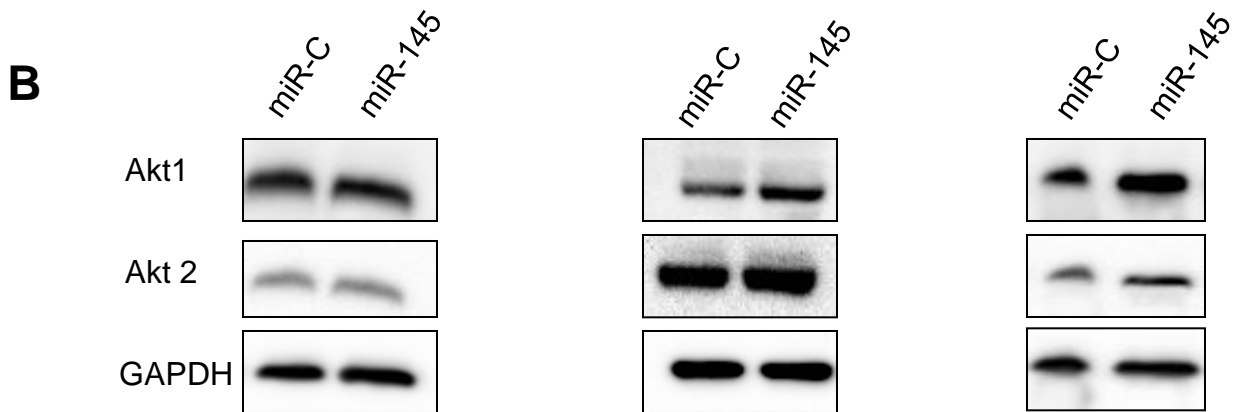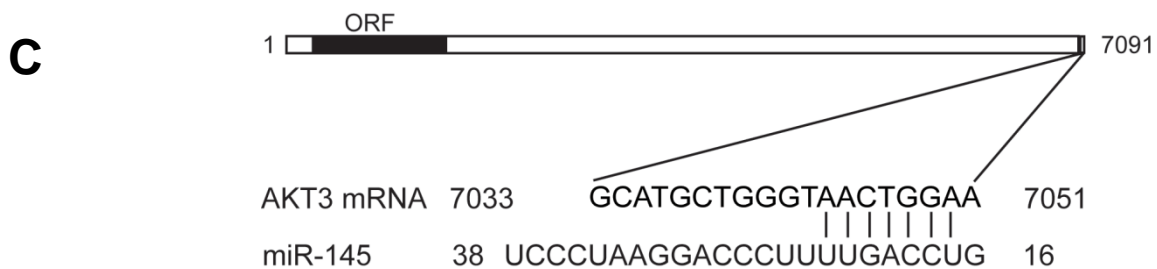

**Supplemental figure 3: (A)** miR-145 and MAPK pathways: MiR-145 does not affect p-p42/44 and p-MEK<sup>(T202/Y204)</sup> levels. **(B)** miR-145 overexpression does not affect Akt-1 and Akt-2 expression **(C)** The region of 3'-UTR of human Akt-3 mRNA complementary to miR-145 is shown.
