# Supplementary material
Source: PubMed Central journal article supplement (PMC8375571)
Supplement: NIHMS1720645-supplement-Supple_fig_4.pdf [file NIHMS1720645-supplement-Supple_fig_4.pdf]

**A****Lung**

miR-C

miR-145

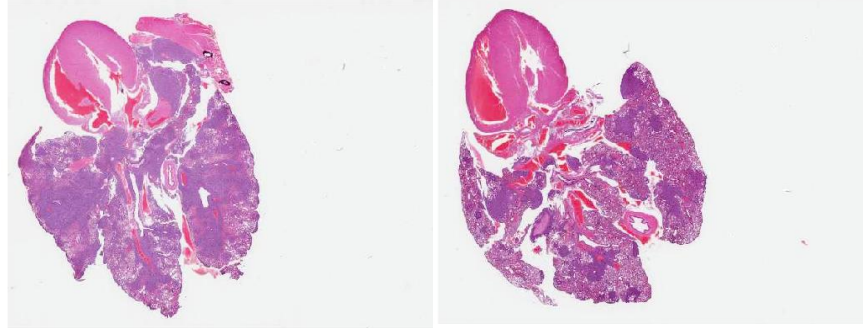

miR-C

miR-145

Normal mouse lung

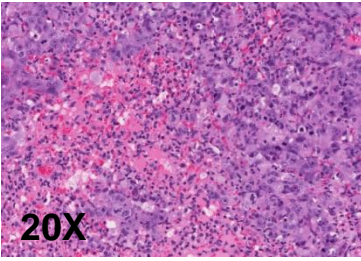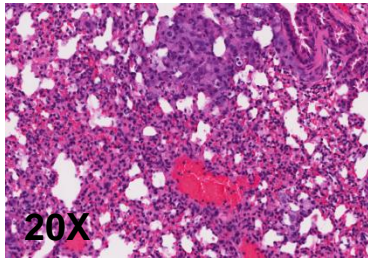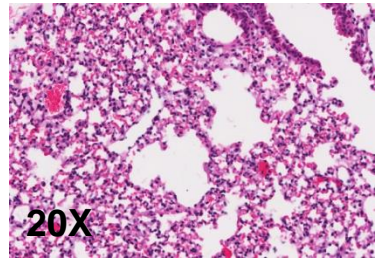

PCNA

miR-C

miR-145

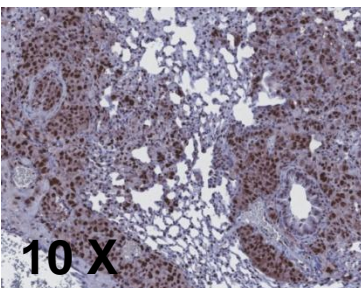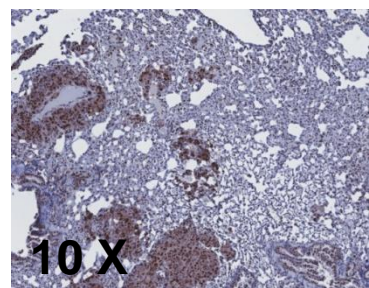**B****Spleen**

miR-C

miR-145

Normal mouse

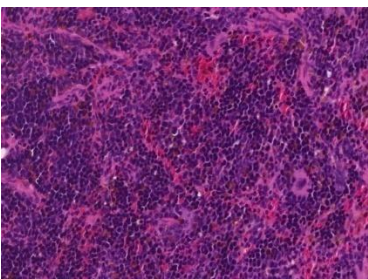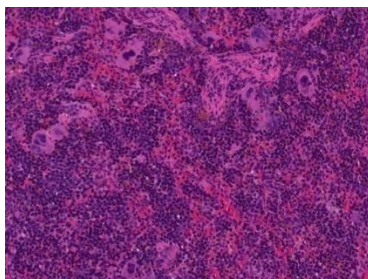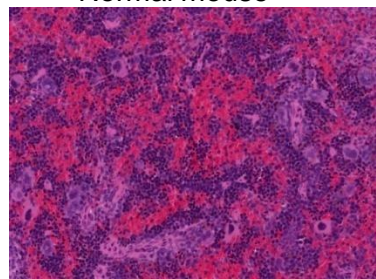

**Supplemental figure 4: (A) Histologic analyses of lung metastasis by H&E and PCNA. (B) Splenic metastasis validation by H&E staining.**
