# Supplementary material
Source: PubMed Central journal article supplement (PMC8375571)
Supplement: NIHMS1720645-supplement-Supple_table_1.pdf [file NIHMS1720645-supplement-Supple_table_1.pdf]

| <b>Antibody</b> | <b>Company</b> | <b>Reference ID</b> |
|-----------------|----------------|---------------------|
| p21             | Santa Cruz     | Sc-397              |
| Cyclin D1       | Cell signaling | 2922                |
| CDC25C          | Cell signaling | 4688                |
| N-Cadherin      | Millipore      | 04-1126             |
| CD44            | Cell signaling | 5640                |
| p-Akt           | Cell signaling | 9271                |
| Akt             | Cell signaling | 9272                |
| Akt-3           | Cell signaling | 8013                |
| Akt-1           | Cell signaling | 2938                |
| Akt-2           | Cell signaling | 3063                |
| PCNA            | Santa Cruz     | 7907                |
| VEGF            | Abcam          | 46154               |
| HIF-1 $\alpha$  | BD biosciences | 610958              |
| MEK             | Cell signaling | 9122                |
| p-MEK           | Cell signaling | 9154                |
| ERK             | Cell signaling | 4695                |
| p-ERK           | Cell signaling | 4370                |
| CD63            | Abcam          | 118307              |

**Supplemental Table 1:** References of the antibody used for western blot and immunohistochemistry assays.
